# Supplementary material for: SARS-CoV-2 Papain-like Protease Negatively Regulates the NLRP3 Inflammasome Pathway and Pyroptosis by Reducing the Oligomerization and Ubiquitination of ASC
Source: MDPI journal article supplement (doi:10.3390/microorganisms11112799), 2023-11-17
Supplement: s1 [file s1]

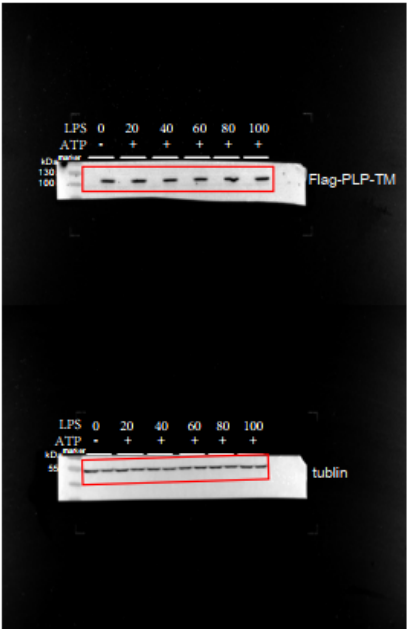

SourceData Figure S2

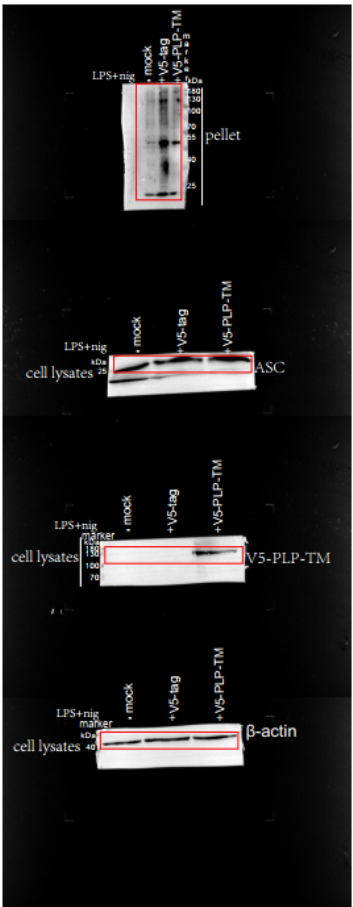

SourceData Figure S4

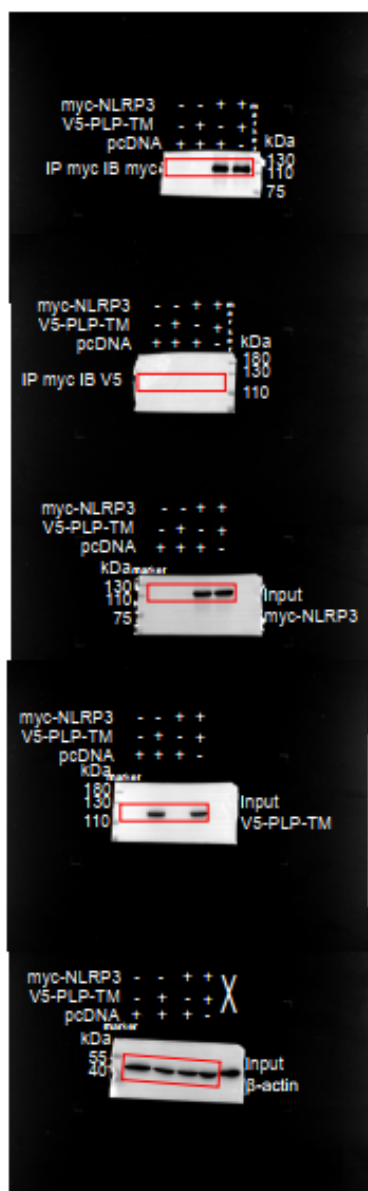

SourceData Figure S5A

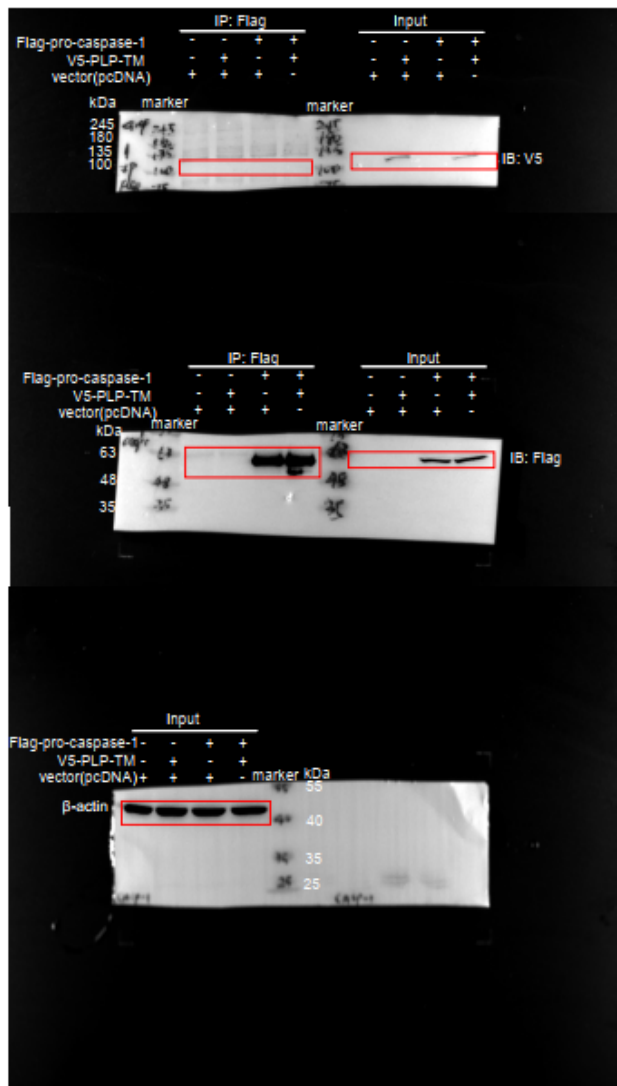

SourceDataF5B

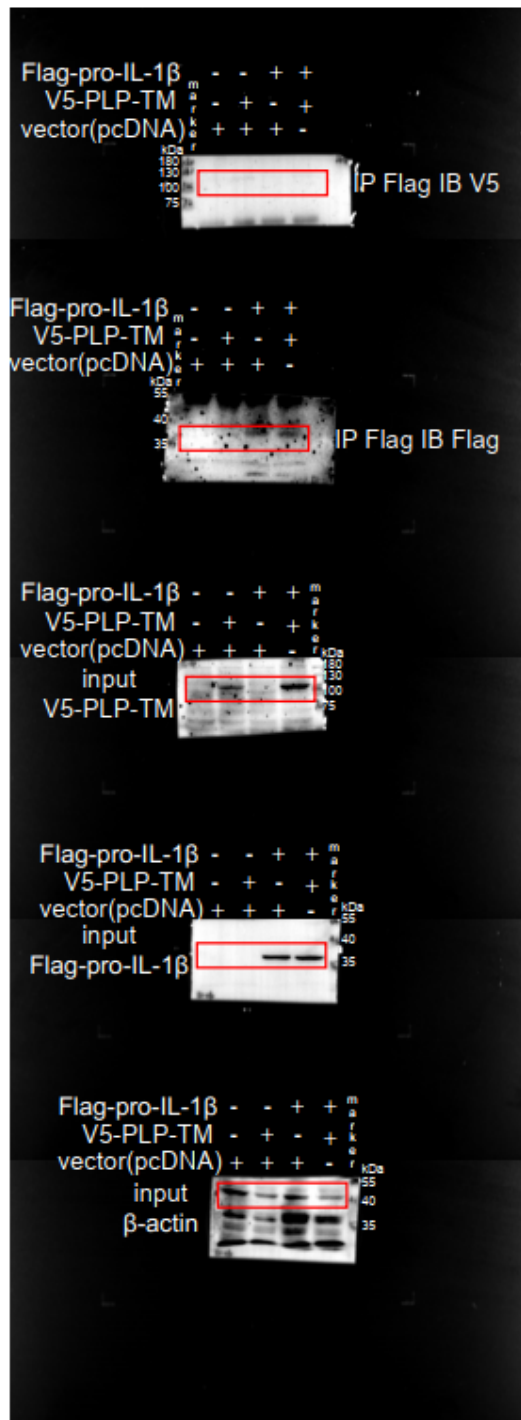

SourceData Figure S5C
